# Supplementary material for: Gene expression profiling during hibernation in the European hamster
Source: PubMed Central journal article supplement (PMC6120936; doi:10.1038/s41598-018-31506-2), 2018-09-03
Supplement: 41598_2018_31506_MOESM1_ESM.pdf [file 41598_2018_31506_MOESM1_ESM.pdf]

Gene expression profiling during hibernation in the European hamster.

Célia Gautier, Béatrice Bothorel, Dominique Ciocca, Damien Valour, Albane Gaudeau, Clémence Dupré, Giulia Lizzo, Chantal Brasseur, Isabelle Riest-Fery, Jean-Philippe Stephan, Olivier Nosjean, Jean A. Boutin, Sophie-Pénélope Guénin, Valérie Simonneaux

**Table S1:** Median, first quartile (25 %), third quartile (75 %), and interquartile (Q75%-Q25%) of absolute RNA copies of each gene in each organ at each hibernation state (N=Normothermia, T=Torpor, A= Arousal).

|                 |   | Per1   |                |                |                           | Bmal1  |                |                |                           | Rev-Erba |                |                |                           |
|-----------------|---|--------|----------------|----------------|---------------------------|--------|----------------|----------------|---------------------------|----------|----------------|----------------|---------------------------|
|                 |   | Median | Quartile (25%) | Quartile (75%) | Interquartile (Q75%-Q25%) | Median | Quartile (25%) | Quartile (75%) | Interquartile (Q75%-Q25%) | Median   | Quartile (25%) | Quartile (75%) | Interquartile (Q75%-Q25%) |
| Cerebral Cortex | N | 41100  | 27200          | 54150          | 26950                     | 4960   | 2540           | 5210           | 2670                      | 58000    | 43450          | 76600          | 33150                     |
|                 | T | 63300  | 55000          | 97700          | 42700                     | 4040   | 3270           | 5620           | 2350                      | 47100    | 41500          | 85000          | 43500                     |
|                 | A | 91300  | 77600          | 151550         | 73950                     | 3860   | 3650           | 5250           | 1600                      | 52500    | 40050          | 63450          | 23400                     |
| Hypothalamus    | N | 43600  | 30450          | 60550          | 30100                     | 8040   | 6300           | 8920           | 2620                      | 121800   | 90000          | 146600         | 56600                     |
|                 | T | 66400  | 28400          | 88100          | 59700                     | 3640   | 1360           | 4510           | 3150                      | 53400    | 24400          | 74250          | 49850                     |
|                 | A | 110700 | 102000         | 113200         | 11200                     | 4080   | 3600           | 6620           | 3020                      | 58800    | 46850          | 68650          | 21800                     |
| Pituitary gland | N | 140200 | 107800         | 174400         | 66600                     | 5720   | 4560           | 6140           | 1580                      | 202000   | 169000         | 239000         | 70000                     |
|                 | T | 488000 | 447000         | 536500         | 89500                     | 6980   | 5840           | 7780           | 1940                      | 279000   | 244500         | 309000         | 64500                     |
|                 | A | 392000 | 363000         | 490000         | 127000                    | 18080  | 7980           | 22680          | 14700                     | 167000   | 164500         | 176000         | 11500                     |
| Retina          | N | 180000 | 155100         | 253000         | 97900                     | 63000  | 58600          | 67800          | 9200                      | 200000   | 185000         | 258000         | 73000                     |
|                 | T | 269000 | 230500         | 303500         | 73000                     | 58800  | 41230          | 66800          | 25570                     | 173600   | 141600         | 194000         | 52400                     |
|                 | A | 336000 | 298000         | 397000         | 99000                     | 93800  | 85700          | 108400         | 22700                     | 192000   | 172250         | 204500         | 32250                     |
| Liver           | N | 13900  | 10000          | 20700          | 10700                     | 1440   | 780            | 2610           | 1830                      | 38200    | 29400          | 48650          | 19250                     |
|                 | T | 38100  | 28550          | 57400          | 28850                     | 2180   | 1520           | 3520           | 2000                      | 38800    | 23650          | 58400          | 34750                     |
|                 | A | 31300  | 27350          | 44450          | 17100                     | 1640   | 1290           | 1950           | 660                       | 22000    | 16650          | 39600          | 22950                     |
| BAT             | N | 28200  | 22500          | 31200          | 8700                      | 1080   | 740            | 1480           | 740                       | 46600    | 46400          | 60000          | 13600                     |
|                 | T | 87800  | 52500          | 96750          | 44250                     | 1380   | 1070           | 1620           | 550                       | 69500    | 55950          | 77700          | 21750                     |
|                 | A | 75400  | 53800          | 111950         | 58150                     | 1140   | 870            | 2390           | 1520                      | 52200    | 40900          | 61600          | 20700                     |
| Heart           | N | 27000  | 22500          | 32300          | 9800                      | 1600   | 1220           | 1920           | 700                       | 55000    | 48700          | 60700          | 12000                     |
|                 | T | 100400 | 83750          | 134850         | 51100                     | 1720   | 960            | 2760           | 1800                      | 59500    | 50600          | 66200          | 15600                     |
|                 | A | 99700  | 83100          | 144900         | 61800                     | 1820   | 1110           | 2240           | 1130                      | 32300    | 26150          | 39350          | 13200                     |
| Adrenal glands  | N | 99200  | 59000          | 126050         | 67050                     | 3660   | 2440           | 4520           | 2080                      | 94200    | 74600          | 110050         | 35450                     |
|                 | T | 275000 | 226500         | 347000         | 120500                    | 7700   | 6550           | 8250           | 1700                      | 94900    | 76400          | 112350         | 35950                     |
|                 | A | 313000 | 138600         | 399500         | 260900                    | 7380   | 3400           | 10310          | 6910                      | 97400    | 48800          | 118900         | 70100                     |

**Table S1(Cont'd) :** Median, first quartile (25 %), third quartile (75 %), and interquartile (Q75%-Q25%) of absolute RNA copies of each gene in each organ at each hibernation state

|                 |   | Clock  |                |                |                           | Per2   |                |                |                           | MT1    |                |                |                           |
|-----------------|---|--------|----------------|----------------|---------------------------|--------|----------------|----------------|---------------------------|--------|----------------|----------------|---------------------------|
|                 |   | Median | Quartile (25%) | Quartile (75%) | Interquartile (Q75%-Q25%) | Median | Quartile (25%) | Quartile (75%) | Interquartile (Q75%-Q25%) | Median | Quartile (25%) | Quartile (75%) | Interquartile (Q75%-Q25%) |
| Cerebral Cortex | N | 54720  | 48900          | 69340          | 20440                     | 14010  | 11895          | 21350          | 9455                      | 91     | 76             | 135            | 60                        |
|                 | T | 41020  | 37030          | 47350          | 10320                     | 17420  | 16270          | 25900          | 9630                      | 111    | 86             | 128            | 42                        |
|                 | A | 51180  | 44530          | 72020          | 27490                     | 40300  | 32650          | 47350          | 14700                     | 105    | 79             | 129            | 50                        |
| Hypothalamus    | N | 102600 | 67820          | 119600         | 51780                     | 25000  | 14685          | 31750          | 17065                     | 349    | 283            | 406            | 123                       |
|                 | T | 41280  | 31600          | 50160          | 18560                     | 18100  | 11520          | 22500          | 10980                     | 227    | 156            | 259            | 103                       |
|                 | A | 64160  | 49950          | 77420          | 27470                     | 48600  | 41850          | 60400          | 18550                     | 251    | 212            | 399            | 187                       |
| Pituitary gland | N | 168000 | 159400         | 169400         | 10000                     | 45400  | 36100          | 49300          | 13200                     | 3093   | 2167           | 3313           | 1147                      |
|                 | T | 144400 | 126400         | 155000         | 28600                     | 109700 | 94900          | 126100         | 31200                     | 2107   | 1432           | 2250           | 818                       |
|                 | A | 164800 | 163400         | 174600         | 11200                     | 143400 | 95400          | 183400         | 88000                     | 2280   | 2140           | 3133           | 993                       |
| Retina          | N | 217600 | 190100         | 264300         | 74200                     | 49000  | 45300          | 54800          | 9500                      | 507    | 324            | 1740           | 1416                      |
|                 | T | 172000 | 160900         | 177000         | 16100                     | 55700  | 43350          | 60750          | 17400                     | 425    | 384            | 658            | 274                       |
|                 | A | 220000 | 213800         | 238100         | 24300                     | 131700 | 103200         | 155700         | 52500                     | 405    | 330            | 460            | 130                       |
| Liver           | N | 23380  | 18600          | 29500          | 10900                     | 7740   | 6675           | 10355          | 3680                      | 67     | 28             | 80             | 52                        |
|                 | T | 21480  | 17340          | 26530          | 9190                      | 24200  | 7350           | 33900          | 26550                     | 33     | 28             | 50             | 22                        |
|                 | A | 23580  | 18720          | 25090          | 6370                      | 29500  | 25450          | 44800          | 19350                     | 37     | 32             | 53             | 22                        |
| BAT             | N | 56480  | 46290          | 65140          | 18850                     | 17500  | 15725          | 22050          | 6325                      | 69     | 34             | 148            | 114                       |
|                 | T | 42900  | 33680          | 46760          | 13080                     | 22200  | 19800          | 23700          | 3900                      | 39     | 28             | 68             | 40                        |
|                 | A | 60300  | 47780          | 71190          | 23410                     | 56500  | 47500          | 59200          | 11700                     | 27     | 12             | 56             | 44                        |
| Heart           | N | 58740  | 52360          | 67010          | 14650                     | 6150   | 5380           | 8105           | 2725                      | 150    | 113            | 225            | 113                       |
|                 | T | 51540  | 37500          | 57710          | 20210                     | 12570  | 9070           | 15275          | 6205                      | 188    | 130            | 195            | 65                        |
|                 | A | 66500  | 54280          | 68240          | 13960                     | 46700  | 36950          | 49900          | 12950                     | 149    | 123            | 176            | 53                        |
| Adrenal glands  | N | 76960  | 48080          | 93010          | 44930                     | 26100  | 19400          | 33100          | 13700                     | 263    | 178            | 354            | 176                       |
|                 | T | 62840  | 53460          | 74750          | 21290                     | 47100  | 35650          | 50400          | 14750                     | 112    | 100            | 123            | 23                        |
|                 | A | 90740  | 54410          | 96500          | 42090                     | 103700 | 69150          | 138850         | 69700                     | 147    | 104            | 264            | 159                       |

**Table S1 (cont'd):** Median, first quartile (25 %), third quartile (75 %), and interquartile (Q75%-Q25%) of absolute RNA copies of each gene in each organ at each hibernation state

|                 |   | MT2    |                |                |                           | GPR50  |                |                |                           | QR2    |                |                |                           |
|-----------------|---|--------|----------------|----------------|---------------------------|--------|----------------|----------------|---------------------------|--------|----------------|----------------|---------------------------|
|                 |   | Median | Quartile (25%) | Quartile (75%) | Interquartile (Q75%-Q25%) | Median | Quartile (25%) | Quartile (75%) | Interquartile (Q75%-Q25%) | Median | Quartile (25%) | Quartile (75%) | Interquartile (Q75%-Q25%) |
| Cerebral Cortex | N | 646    | 561            | 954            | 393                       | 13     | 9              | 16             | 7                         | 8460   | 7060           | 9710           | 2650                      |
|                 | T | 537    | 486            | 681            | 196                       | 27     | 19             | 30             | 11                        | 8840   | 7170           | 10190          | 3020                      |
|                 | A | 1005   | 698            | 1245           | 547                       | 39     | 27             | 45             | 19                        | 6760   | 5590           | 8750           | 3160                      |
| Hypothalamus    | N | 688    | 548            | 880            | 332                       | 129    | 79             | 165            | 85                        | 20900  | 14610          | 22770          | 8160                      |
|                 | T | 542    | 354            | 638            | 284                       | 80     | 23             | 85             | 63                        | 12160  | 9480           | 15480          | 6000                      |
|                 | A | 1099   | 880            | 1522           | 642                       | 115    | 86             | 156            | 69                        | 8700   | 7540           | 9730           | 2190                      |
| Pituitary gland | N | 796    | 678            | 1224           | 546                       | 485    | 385            | 645            | 260                       | 29200  | 27960          | 30460          | 2500                      |
|                 | T | 725    | 606            | 942            | 336                       | 295    | 209            | 360            | 150                       | 25200  | 23720          | 27000          | 3280                      |
|                 | A | 1128   | 818            | 1455           | 637                       | 527    | 411            | 742            | 331                       | 22080  | 19700          | 24400          | 4700                      |
| Retina          | N | 751    | 460            | 1605           | 1145                      | 202    | 111            | 515            | 404                       | 22640  | 16800          | 26470          | 9670                      |
|                 | T | 723    | 657            | 965            | 308                       | 262    | 230            | 310            | 80                        | 20900  | 19020          | 24620          | 5600                      |
|                 | A | 1731   | 1543           | 2050           | 508                       | 351    | 325            | 393            | 69                        | 13820  | 10660          | 15860          | 5200                      |
| Liver           | N | 239    | 221            | 374            | 153                       | 21     | 17             | 28             | 12                        | 59800  | 49800          | 72300          | 22500                     |
|                 | T | 67     | 52             | 137            | 86                        | 10     | 5              | 15             | 10                        | 62200  | 55700          | 82900          | 27200                     |
|                 | A | 88     | 65             | 102            | 38                        | 11     | 9              | 26             | 18                        | 42200  | 39800          | 50100          | 10300                     |
| BAT             | N | 295    | 263            | 352            | 89                        | 25     | 11             | 42             | 31                        | 34400  | 30800          | 41000          | 10200                     |
|                 | T | 127    | 94             | 136            | 42                        | 12     | 9              | 26             | 17                        | 38600  | 34480          | 43200          | 8720                      |
|                 | A | 109    | 82             | 127            | 46                        | 17     | 11             | 36             | 26                        | 28540  | 23210          | 31180          | 7970                      |
| Heart           | N | 337    | 279            | 377            | 98                        | 25     | 19             | 36             | 16                        | 21000  | 16720          | 27830          | 11110                     |
|                 | T | 213    | 168            | 243            | 75                        | 27     | 22             | 32             | 10                        | 24960  | 18310          | 28930          | 10620                     |
|                 | A | 225    | 206            | 270            | 64                        | 24     | 23             | 29             | 6                         | 22460  | 17560          | 24060          | 6500                      |
| Adrenal glands  | N | 290    | 252            | 408            | 157                       | 62     | 36             | 93             | 57                        | 34800  | 24370          | 43600          | 19230                     |
|                 | T | 216    | 173            | 236            | 63                        | 47     | 43             | 54             | 10                        | 39600  | 32920          | 43500          | 10580                     |
|                 | A | 240    | 205            | 341            | 136                       | 67     | 52             | 92             | 40                        | 34600  | 24910          | 40200          | 15290                     |

**Table S1(cont'd):** Median, first quartile (25 %), third quartile (75 %), and interquartile (Q75%-Q25%) of absolute RNA copies of each gene in each organ at each hibernation state

|                 |   | SIRT1  |                |                |                           | TXNIP  |                |                |                           | PPAR $\alpha$ |                |                |                           |
|-----------------|---|--------|----------------|----------------|---------------------------|--------|----------------|----------------|---------------------------|---------------|----------------|----------------|---------------------------|
|                 |   | Median | Quartile (25%) | Quartile (75%) | Interquartile (Q75%-Q25%) | Median | Quartile (25%) | Quartile (75%) | Interquartile (Q75%-Q25%) | Median        | Quartile (25%) | Quartile (75%) | Interquartile (Q75%-Q25%) |
| Cerebral Cortex | N | 27800  | 19970          | 31800          | 11830                     | 41700  | 31150          | 60350          | 29200                     | 5600          | 4950           | 6750           | 1800                      |
|                 | T | 23200  | 20630          | 26460          | 5830                      | 50600  | 44100          | 73550          | 29450                     | 3400          | 2350           | 4700           | 2350                      |
|                 | A | 30200  | 25760          | 40400          | 14640                     | 32900  | 26400          | 39350          | 12950                     | 6100          | 5000           | 7800           | 2800                      |
| Hypothalamus    | N | 64000  | 45900          | 68700          | 22800                     | 96700  | 71650          | 143900         | 72250                     | 9800          | 7350           | 13800          | 6450                      |
|                 | T | 31100  | 22080          | 38760          | 16680                     | 66000  | 29200          | 103700         | 74500                     | 2600          | 320            | 4150           | 3830                      |
|                 | A | 40400  | 36040          | 47900          | 11860                     | 50200  | 32450          | 59150          | 26700                     | 7100          | 4900           | 9250           | 4350                      |
| Pituitary gland | N | 80800  | 73000          | 90000          | 17000                     | 516000 | 439000         | 743000         | 304000                    | 17800         | 15500          | 21100          | 5600                      |
|                 | T | 84800  | 82800          | 94500          | 11700                     | 754000 | 642500         | 932000         | 289500                    | 16500         | 14800          | 17650          | 2850                      |
|                 | A | 92400  | 91200          | 100400         | 9200                      | 420000 | 375000         | 465000         | 90000                     | 21800         | 17900          | 24900          | 7000                      |
| Retina          | N | 160600 | 148200         | 175100         | 26900                     | 25700  | 24250          | 28400          | 4150                      | 66000         | 65200          | 73350          | 8150                      |
|                 | T | 135600 | 118000         | 151300         | 33300                     | 36500  | 31150          | 43600          | 12450                     | 24200         | 20450          | 25600          | 5150                      |
|                 | A | 199200 | 107400         | 211400         | 104000                    | 28400  | 21350          | 35200          | 13850                     | 39300         | 31100          | 66450          | 35350                     |
| Liver           | N | 12800  | 7720           | 14700          | 6980                      | 29800  | 22850          | 50350          | 27500                     | 104300        | 94600          | 119500         | 24900                     |
|                 | T | 19340  | 15890          | 22440          | 6550                      | 50000  | 35050          | 89250          | 54200                     | 91300         | 49900          | 131050         | 81150                     |
|                 | A | 16800  | 15490          | 19870          | 4380                      | 42900  | 19050          | 119550         | 100500                    | 69700         | 59300          | 88550          | 29250                     |
| BAT             | N | 35000  | 27480          | 45400          | 17920                     | 590000 | 501500         | 719000         | 217500                    | 383000        | 336500         | 449000         | 112500                    |
|                 | T | 30380  | 20100          | 35110          | 15010                     | 550000 | 385500         | 642000         | 256500                    | 273000        | 223700         | 290000         | 66300                     |
|                 | A | 51200  | 38200          | 63900          | 25700                     | 513000 | 374000         | 603000         | 229000                    | 185000        | 141350         | 209000         | 67650                     |
| Heart           | N | 29500  | 26200          | 38400          | 12200                     | 366000 | 219000         | 457500         | 238500                    | 28500         | 23400          | 34400          | 11000                     |
|                 | T | 30760  | 21660          | 33900          | 12240                     | 281000 | 175000         | 416000         | 241000                    | 20400         | 14800          | 22750          | 7950                      |
|                 | A | 34400  | 31710          | 37900          | 6190                      | 147700 | 102900         | 187500         | 84600                     | 22800         | 19600          | 31500          | 11900                     |
| Adrenal glands  | N | 43200  | 30190          | 51400          | 21210                     | 206000 | 145400         | 264500         | 119100                    | 12200         | 8900           | 15400          | 6500                      |
|                 | T | 40600  | 36700          | 46800          | 10100                     | 146100 | 128650         | 222500         | 93850                     | 9800          | 8600           | 10650          | 2050                      |
|                 | A | 57400  | 36200          | 64600          | 28400                     | 201000 | 169400         | 245000         | 75600                     | 14900         | 12400          | 19950          | 7550                      |

**Table S1(cont'd):** Median, first quartile (25 %), third quartile (75 %), and interquartile (Q75%-Q25%) of absolute RNA copies of each gene in each organ at each hibernation state

|                 |   | PGC1 $\alpha$ |                |                |                           | FGF21  |                |                |                           | ObR    |                |                |                           |
|-----------------|---|---------------|----------------|----------------|---------------------------|--------|----------------|----------------|---------------------------|--------|----------------|----------------|---------------------------|
|                 |   | Median        | Quartile (25%) | Quartile (75%) | Interquartile (Q75%-Q25%) | Median | Quartile (25%) | Quartile (75%) | Interquartile (Q75%-Q25%) | Median | Quartile (25%) | Quartile (75%) | Interquartile (Q75%-Q25%) |
| Cerebral Cortex | N | 26200         | 18550          | 36900          | 18350                     | 198    | 156            | 284            | 128                       | 1159   | 972            | 1583           | 611                       |
|                 | T | 13000         | 10850          | 17650          | 6800                      | 189    | 145            | 269            | 125                       | 1291   | 839            | 1605           | 767                       |
|                 | A | 20100         | 17300          | 29500          | 12200                     | 264    | 219            | 410            | 191                       | 1287   | 1097           | 1451           | 354                       |
| Hypothalamus    | N | 46900         | 42200          | 54550          | 12350                     | 278    | 235            | 337            | 103                       | 2160   | 1716           | 2675           | 959                       |
|                 | T | 13800         | 7400           | 19500          | 12100                     | 179    | 116            | 208            | 92                        | 2250   | 1376           | 2595           | 1219                      |
|                 | A | 26300         | 16650          | 29850          | 13200                     | 330    | 282            | 368            | 86                        | 1363   | 1066           | 1810           | 744                       |
| Pituitary gland | N | 5400          | 4300           | 6900           | 2600                      | 630    | 522            | 1235           | 713                       | 5200   | 4450           | 6360           | 1910                      |
|                 | T | 5500          | 3600           | 6550           | 2950                      | 1371   | 1144           | 1494           | 350                       | 3640   | 3445           | 3840           | 395                       |
|                 | A | 5600          | 5300           | 6800           | 1500                      | 1900   | 1560           | 2180           | 620                       | 3680   | 2950           | 3940           | 990                       |
| Retina          | N | 58000         | 51150          | 82800          | 31650                     | 708    | 551            | 986            | 436                       | 3500   | 2335           | 4810           | 2475                      |
|                 | T | 36200         | 32550          | 49250          | 16700                     | 1544   | 1169           | 1805           | 636                       | 2550   | 2055           | 3130           | 1075                      |
|                 | A | 53000         | 45750          | 60550          | 14800                     | 2800   | 2310           | 3700           | 1390                      | 2520   | 2435           | 2745           | 310                       |
| Liver           | N | 1410          | 780            | 2100           | 1320                      | 5470   | 3230           | 6975           | 3745                      | 10070  | 7700           | 11420          | 3720                      |
|                 | T | 2500          | 1090           | 3250           | 2160                      | 1043   | 804            | 1527           | 723                       | 27240  | 23955          | 31305          | 7350                      |
|                 | A | 3400          | 1750           | 4250           | 2500                      | 11840  | 1715           | 16295          | 14581                     | 22240  | 18935          | 36290          | 17355                     |
| BAT             | N | 57600         | 50700          | 63900          | 13200                     | 211    | 180            | 289            | 109                       | 449    | 315            | 558            | 244                       |
|                 | T | 46800         | 32600          | 52300          | 19700                     | 127    | 111            | 159            | 48                        | 417    | 374            | 538            | 164                       |
|                 | A | 86600         | 51300          | 154500         | 103200                    | 164    | 136            | 199            | 63                        | 271    | 220            | 322            | 102                       |
| Heart           | N | 49900         | 37950          | 59850          | 21900                     | 4260   | 3630           | 5550           | 1920                      | 1421   | 1323           | 1625           | 303                       |
|                 | T | 40300         | 33700          | 54050          | 20350                     | 4770   | 2720           | 5805           | 3085                      | 1393   | 1006           | 1700           | 694                       |
|                 | A | 36500         | 29550          | 42150          | 12600                     | 3830   | 3230           | 5195           | 1965                      | 979    | 782            | 1124           | 343                       |
| Adrenal glands  | N | 1590          | 1035           | 1700           | 665                       | 467    | 352            | 640            | 288                       | 1480   | 1136           | 1745           | 610                       |
|                 | T | 930           | 640            | 1460           | 820                       | 217    | 203            | 366            | 163                       | 930    | 783            | 1191           | 409                       |
|                 | A | 1710          | 1500           | 2000           | 500                       | 1030   | 534            | 1505           | 972                       | 757    | 609            | 993            | 384                       |

**Table S1(end):** Median, first quartile (25 %), third quartile (75 %), and interquartile (Q75%-Q25%) of absolute RNA copies of each gene in each organ at each hibernation state

|                 |   | Dio2   |                |                |                           | Dio3   |                |                |                           | UCP1    |                |                |                           |
|-----------------|---|--------|----------------|----------------|---------------------------|--------|----------------|----------------|---------------------------|---------|----------------|----------------|---------------------------|
|                 |   | Median | Quartile (25%) | Quartile (75%) | Interquartile (Q75%-Q25%) | Median | Quartile (25%) | Quartile (75%) | Interquartile (Q75%-Q25%) | Median  | Quartile (25%) | Quartile (75%) | Interquartile (Q75%-Q25%) |
| Cerebral Cortex | N | 2620   | 2180           | 3175           | 995                       | 790    | 526            | 991            | 465                       |         |                |                |                           |
|                 | T | 1760   | 1625           | 2175           | 550                       | 760    | 258            | 1088           | 830                       |         |                |                |                           |
|                 | A | 1440   | 1110           | 1755           | 645                       | 684    | 627            | 1110           | 484                       |         |                |                |                           |
| Hypothalamus    | N | 1850   | 1615           | 2430           | 815                       | 461    | 289            | 693            | 404                       |         |                |                |                           |
|                 | T | 920    | 660            | 1045           | 385                       | 410    | 132            | 543            | 411                       |         |                |                |                           |
|                 | A | 1130   | 695            | 1495           | 800                       | 463    | 214            | 873            | 659                       |         |                |                |                           |
| Pituitary gland | N | 4220   | 3520           | 4830           | 1310                      | 310    | 244            | 525            | 281                       |         |                |                |                           |
|                 | T | 1680   | 1365           | 2100           | 735                       | 218    | 187            | 286            | 100                       |         |                |                |                           |
|                 | A | 2340   | 1610           | 3030           | 1420                      | 320    | 259            | 657            | 398                       |         |                |                |                           |
| Retina          | N | 2950   | 1640           | 4395           | 2755                      | 2320   | 1865           | 2650           | 786                       |         |                |                |                           |
|                 | T | 1560   | 1415           | 1805           | 390                       | 1550   | 1460           | 1925           | 465                       |         |                |                |                           |
|                 | A | 1880   | 1475           | 2730           | 1255                      | 2000   | 1875           | 2245           | 370                       |         |                |                |                           |
| Liver           | N | 164    | 92             | 270            | 178                       | 39     | 26             | 43             | 17                        |         |                |                |                           |
|                 | T | 60     | 30             | 105            | 76                        | 35     | 28             | 62             | 34                        |         |                |                |                           |
|                 | A | 88     | 51             | 111            | 60                        | 39     | 36             | 46             | 10                        |         |                |                |                           |
| BAT             | N | 5780   | 4375           | 6375           | 2000                      | 101    | 66             | 129            | 64                        | 2970000 | 1680000        | 3825000        | 2145000                   |
|                 | T | 1760   | 1605           | 2255           | 650                       | 83     | 74             | 87             | 13                        | 3270000 | 2405000        | 3790000        | 1385000                   |
|                 | A | 1330   | 1180           | 1650           | 470                       | 236    | 174            | 344            | 170                       | 2370000 | 1860000        | 3375000        | 1515000                   |
| Heart           | N | 670    | 535            | 795            | 260                       | 61     | 46             | 101            | 56                        |         |                |                |                           |
|                 | T | 530    | 405            | 630            | 225                       | 114    | 82             | 145            | 63                        |         |                |                |                           |
|                 | A | 250    | 160            | 325            | 165                       | 129    | 112            | 147            | 35                        |         |                |                |                           |
| Adrenal glands  | N | 280    | 180            | 430            | 250                       | 81     | 54             | 126            | 72                        |         |                |                |                           |
|                 | T | 44     | 12             | 138            | 126                       | 80     | 51             | 105            | 54                        |         |                |                |                           |
|                 | A | 44     | 12             | 160            | 148                       | 160    | 92             | 204            | 112                       |         |                |                |                           |

## Gene expression profiling during hibernation in the European hamster

Célia Gautier<sup>1,2</sup>, Béatrice Bothorel<sup>2</sup>, Dominique Ciocca<sup>2</sup>, Damien Valour<sup>3</sup>, Albane Gaudeau<sup>1</sup>, Clémence Dupré<sup>1</sup>, Giulia Lizzo<sup>1</sup>, Chantal Brasseur<sup>1</sup>, Isabelle Riest-Fery<sup>1</sup>, Jean-Philippe Stephan<sup>1</sup>, Olivier Nosjean<sup>1,4</sup>, Jean A. Boutin<sup>1,4\*</sup>, Sophie-Pénélope Guénin<sup>1,+</sup>, Valérie Simonneaux<sup>2,+\*</sup>

**Supplementary Table S2:** Plasma hormone levels (means± SD) of European hamster during the hibernation cycle (n=5 - 8).

|                          | <b>Normothermia</b> | <b>Torpor</b> | <b>Arousal</b> |
|--------------------------|---------------------|---------------|----------------|
| <b>T3</b> (pmol/ml)      | 1,20 ± 0,18         | 1,08 ± 0,20   | 1,02 ± 0,12    |
| <b>T4</b> (pmol/ml)      | 28,19 ± 4,85        | 19,31 ± 2,68  | 17,69 ± 3,54   |
| <b>Glucose</b> (mmol/ml) | 5,70 ± 2,69         | 3,42 ± 0,78   | 4,32 ± 1,74    |
| <b>Insulin</b> (ng/ml)   | 1,70 ± 0,99         | 0,80 ± 0,41   | 1,76 ± 1,38    |
| <b>Leptin</b> (ng/ml)    | 28,30 ± 8,05        | 14,28 ± 4,99  | 27,69 ± 7,06   |
| <b>Melatonin</b> (pg/ml) | 23,16 ± 27,78       | 18,83 ± 10,22 | 37,67 ± 38,71  |
